# Supplementary material for: Histone Deacetylase Inhibitor, Sodium Butyrate-Induced Metabolic Modulation in Platycodon grandiflorus Roots Enhances Anti-Melanogenic Properties
Source: MDPI journal article supplement (doi:10.3390/ijms241411804), 2023-07-22
Supplement: s1 [file s1]

## Supplementary Information

**Table S1:** Primer list for qRT-PCR analysis

| Gene           | Sequence (5'-3')                                  |
|----------------|---------------------------------------------------|
| Tyrosinase     | F-ATAGGTGCATTGGCTTCTGG<br>R-CCAACGATCCCATTTTCTT   |
| TRP1           | F-GAGTGACATCCTGTGGCTCA<br>R-CGATACCCTGGGAACACTTT  |
| TRP2           | F-GCATCTGTGGAAGGGTTGTT<br>R-ACTCCTTCCTGAATGGGACC  |
| $\beta$ -actin | F-CCCACTCCTAAGAGGAGGATG<br>R-AGGGAGACCAAAGCCTTCAT |

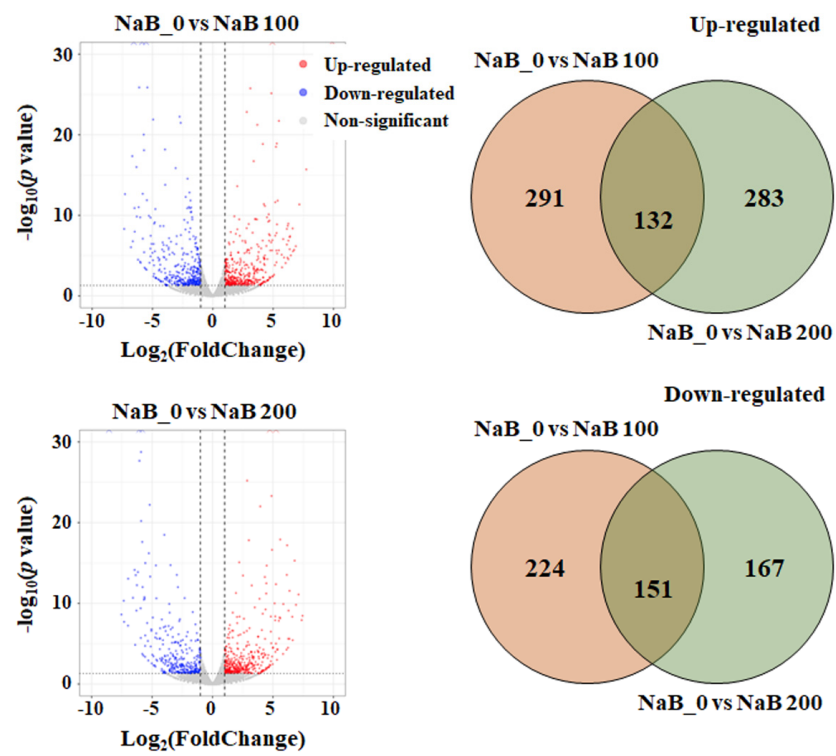

Figure S1. Volcano plot and venn diagram analyses of the DEGs (NaB\_0 vs NaB 100 and NaB\_0 vs NaB 200)

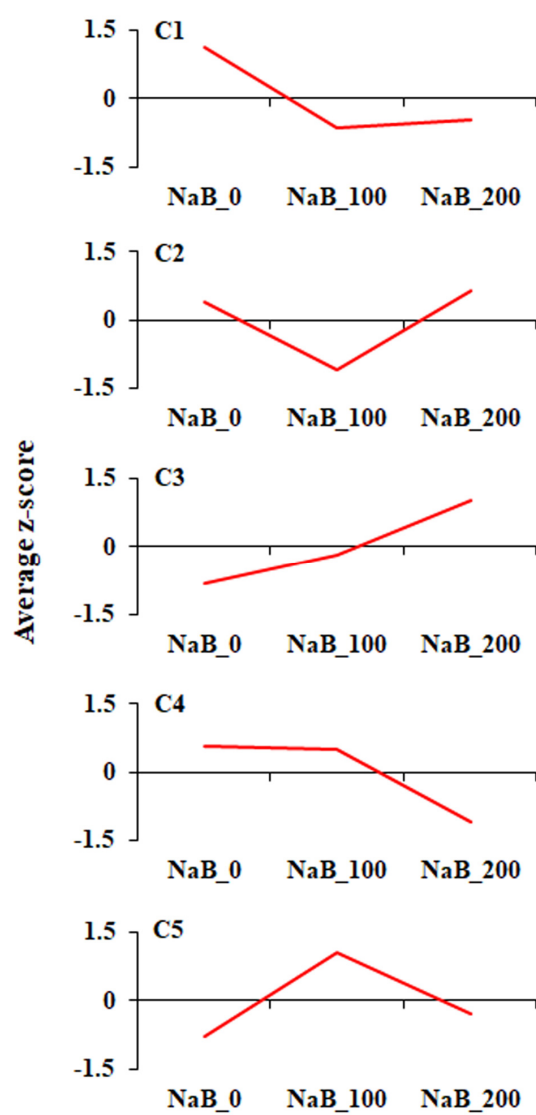

Figure S2. The lines reflect the expression patterns (average z-score) of DEGs in each cluster.
